# Supplementary material for: Using NS1 Flavivirus Protein Microarray to Infer Past Infecting Dengue Virus Serotype and Number of Past Dengue Virus Infections in Vietnamese Individuals
Source: PubMed Central journal article supplement (PMC8205622; doi:10.1093/infdis/jiaa018), 2020-01-22
Supplement: jiaa018_suppl_supplementary_information.pdf [file jiaa018_suppl_supplementary_information.pdf]

## Supplementary Information

Commercially purchased recombinant flavivirus NS1 antigens (Table S1) were diluted to the desired concentration with protein arraying buffer (Main Manufacturing), and spotted onto a 64-pad nitrocellulose coated slide (Satorius, Germany), in duplicate, using a non-contact protein array spotter (Scienion, Germany). Each spot was a drop of 450 pL diluted protein.

| SPOT POSITION | VIRUS                         | ANTIGEN | PRODUCT CODE | PRODUCT NAME                                                         |
|---------------|-------------------------------|---------|--------------|----------------------------------------------------------------------|
| 1, 2          | Dengue virus - serotype 1     | NS1     | 40527-V07H   | NS1 (DV1) -DENV-NS1 (His Tag)                                        |
| 3, 4          | Dengue virus - serotype 2     | NS1     | IT-006-0051p | NS1 (DENV2)                                                          |
| 5, 6          | Dengue virus - serotype 3     | NS1     | IT-006-0052p | NS1 (DENV3)                                                          |
| 7, 8          | Dengue virus - serotype 4     | NS1     | IT-006-0055p | NS1 (DENV4)                                                          |
| 9, 10         | West Nile virus               | NS1     | 40346-V07H   | West Nile Virus (WNV) (lineage 1, strain NY99) NS1 Protein (His Tag) |
| 11, 12        | Japanese Encephalitis virus   | NS1     | IT-006-054p  | NS1 (JEV)                                                            |
| 13, 14        | Yellow fever virus            | NS1     | IT-006-0057p | NS1 (Yellow fever virus)                                             |
| 15, 16        | Zika virus                    | NS1     | IT-006-0059p | NS1 (Zika virus)                                                     |
| 17, 18        | Zika virus - Brasil strain    | NS1     | IT-006-0063p | NS1 (Zika virus/Brazil)                                              |
| 19, 20        | St. Louis Encephalitis virus  | NS1     | IT-006-0058p | NS1 (St. Louis encephalitis virus)                                   |
| 21, 22        | Chikungunya virus - mutant    | E1      | A2323        | Rec. Chikungunya mutant E1 protein                                   |
| 23, 24        | Chikungunya virus - mutant    | E2      | IT-022-004Ep | E2 (Chikungunya virus)                                               |
| 25, 26        | Tick-borne Encephalitis virus | NS1     | IT-006-0056P | NS1 (Tick-borne encephalitis virus)                                  |

**Table S1.** Information of flavivirus NS1 antigens included on one microarray glass slide.

Sample layout & dilution steps

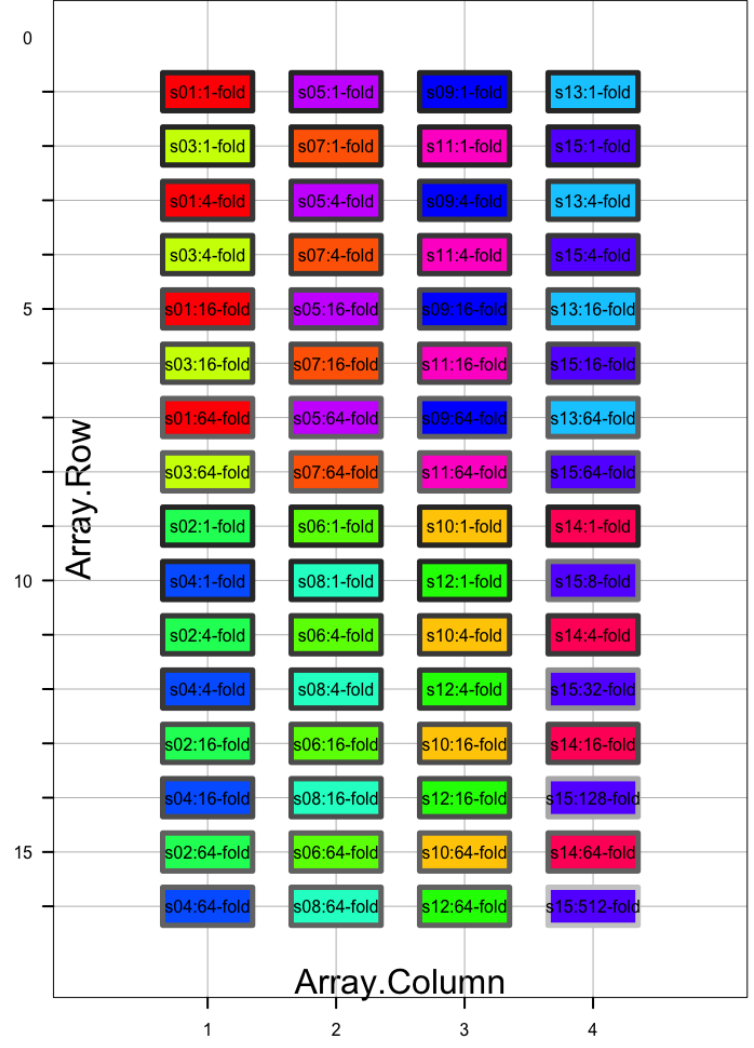

**Figure S1.** Layout of samples and dilutions tested on a microarray. (s = sample)

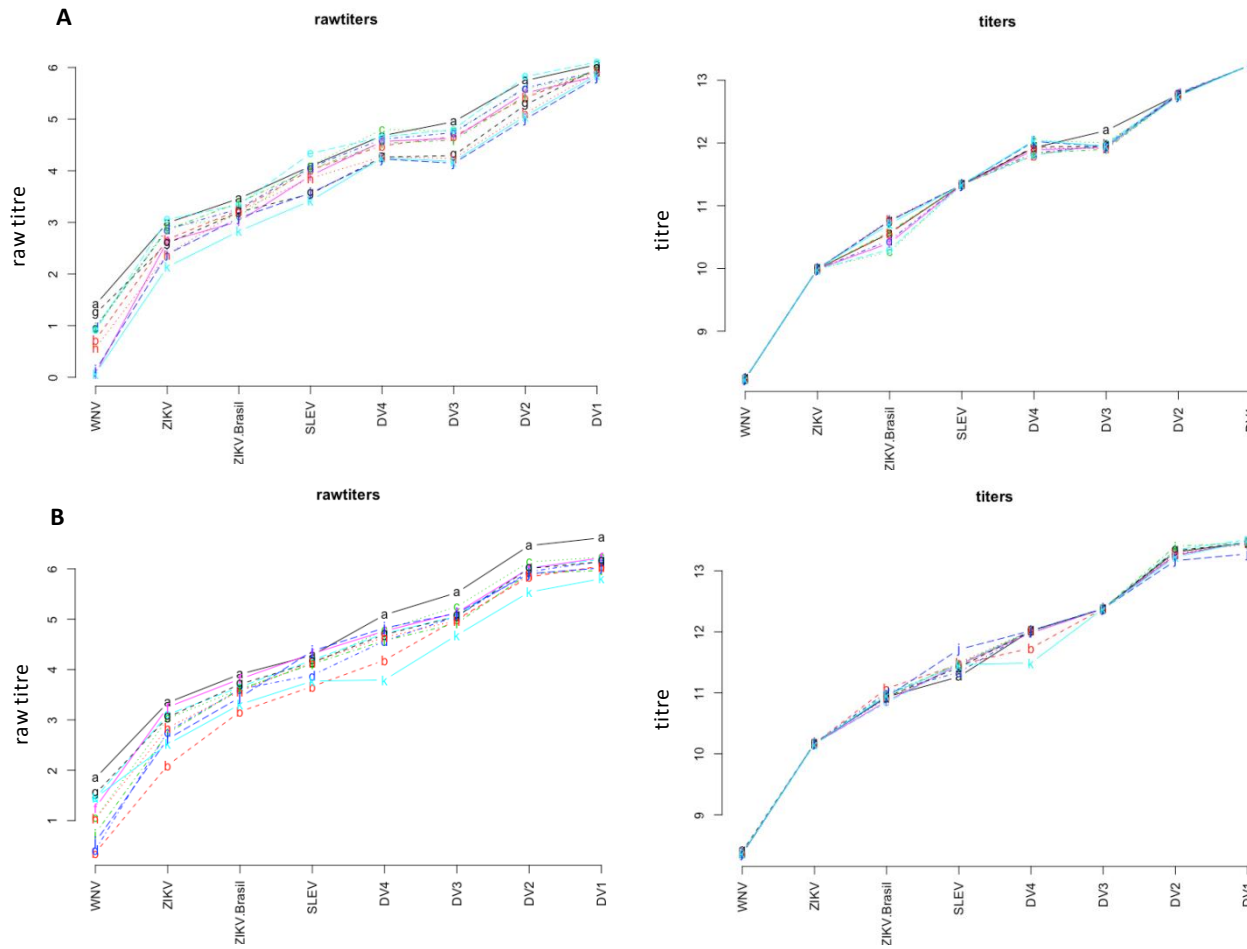

**Figure S2.** Before (left) and after (right) normalisation of positive controls included on tested microarray slides. x-axis indicates antigens that are included in analysis. y-axis of *raw titres* plot indicates log<sub>2</sub>-transformed antibody titres without incorporating dilutions; and y-axis of *titers* plot indicates log<sub>2</sub>-transformed antibody titres after incorporating dilutions. (A) Quality control of the first batch including samples from hospital study; (B) Quality control of the second batch including samples from community study.

**Figure S3.** Changes in microarray titres between two follow-up points. In each follow-up, a dot represents antibody titre of one sample.

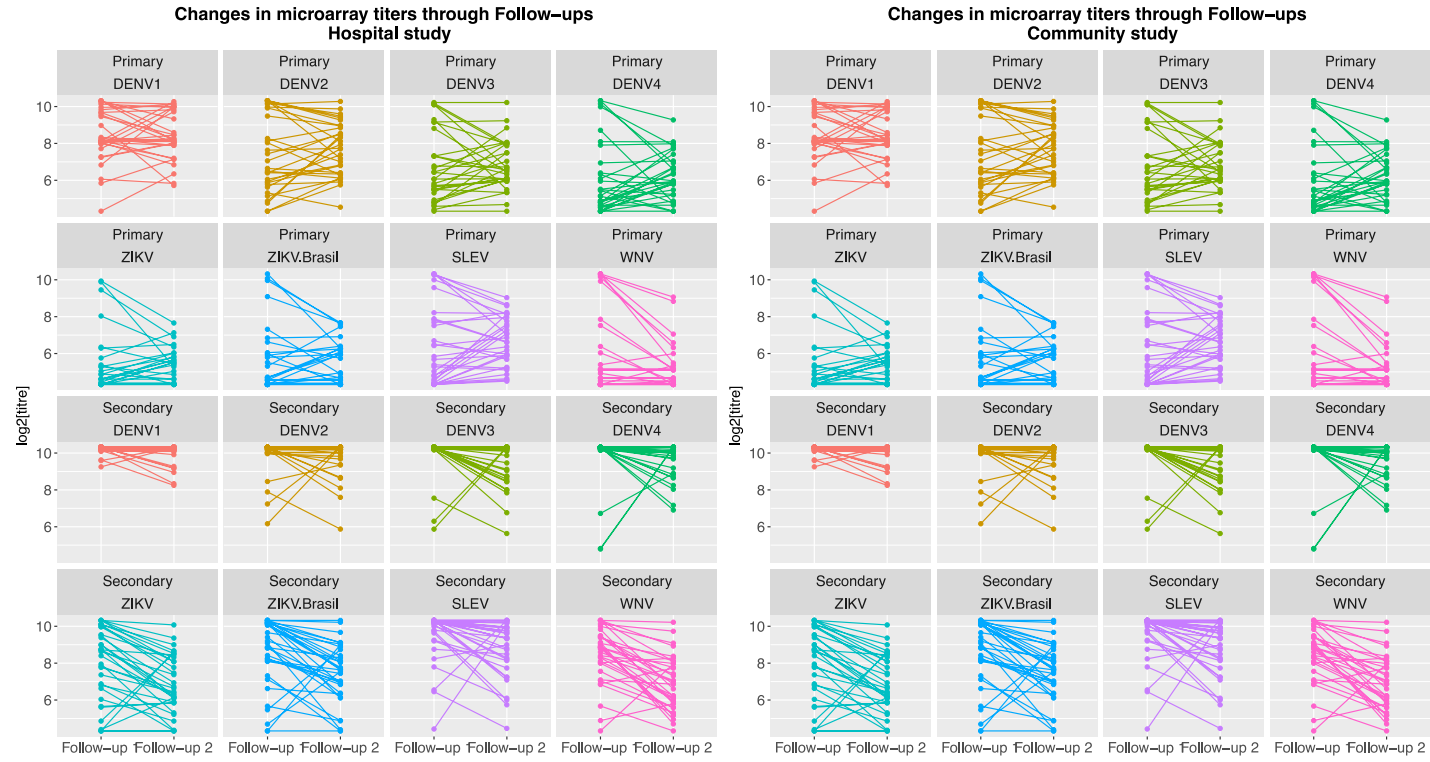

| Outcome     | Variable                               | Both follow-ups |         | Follow-up 1 |         | Follow-up 2 |         |
|-------------|----------------------------------------|-----------------|---------|-------------|---------|-------------|---------|
|             |                                        | Estimate        | p-value | Estimate    | p-value | Estimate    | p-value |
| DENV1 titre | Age                                    | -0.141          | 0.932   | -0.042      | 0.988   | 1.315       | 0.492   |
|             | Gender (Female)                        | -0.011          | 0.945   | -0.160      | 0.520   | -0.069      | 0.247   |
|             | Months to follow-ups                   | 0.033           | 0.126   | 0.933       | 0.064   | -0.069      | 0.247   |
|             | Immune Status (Secondary)              | 2.047           | <0.001  | 2.376       | <0.001  | 1.642       | <0.001  |
|             | Immune Status *<br>Months to follow-up | -0.090          | 0.041   | -2.108      | 0.024   | -0.040      | 0.760   |
|             | Serotype 1                             | 8.242           | <0.001  | 7.373       | <0.001  | 8.918       | <0.001  |
|             | Serotype 2                             | 7.861           | <0.001  | 7.064       | <0.001  | 8.425       | <0.001  |
|             | Serotype 3                             | 7.163           | <0.001  | 5.933       | <0.001  | 8.206       | <0.001  |
|             | Serotype 4                             | 7.936           | <0.001  | 7.218       | <0.001  | 8.548       | <0.001  |
| DENV2 titre | Age                                    | 3.552           | 0.035   | 2.938       | 0.289   | -0.069      | 0.247   |
|             | Gender (Female)                        | -0.106          | 0.494   | -0.272      | 0.273   | 0.063       | 0.737   |
|             | Months to follow-ups                   | 0.037           | 0.096   | 0.209       | 0.676   | -0.052      | 0.415   |
|             | Immune Status (Secondary)              | 2.114           | <0.001  | 2.390       | <0.001  | 1.786       | <0.001  |
|             | Immune Status *<br>Months to follow-up | -0.078          | 0.083   | -0.482      | 0.611   | 0.057       | 0.686   |
|             | Serotype 1                             | 6.794           | <0.001  | 6.507       | <0.001  | 7.585       | <0.001  |
|             | Serotype 2                             | 7.919           | <0.001  | 7.955       | <0.001  | 8.327       | <0.001  |
|             | Serotype 3                             | 6.458           | <0.001  | 6.021       | <0.001  | 7.345       | <0.001  |
|             | Serotype 4                             | 7.346           | <0.001  | 7.322       | <0.001  | 7.821       | <0.001  |
| DENV3 titre | Age                                    | 1.367           | 0.465   | 3.109       | 0.319   | 0.732       | 0.742   |
|             | Gender (Female)                        | 0.048           | 0.778   | -0.061      | 0.828   | 0.211       | 0.302   |
|             | Months to follow-ups                   | 0.005           | 0.833   | 0.644       | 0.254   | -0.082      | 0.234   |
|             | Immune Status (Secondary)              | 2.942           | <0.001  | 3.204       | <0.001  | 2.618       | <0.001  |
|             | Immune Status *<br>Months to follow-up | -0.078          | 0.119   | -0.528      | 0.620   | 0.064       | 0.675   |
|             | Serotype 1                             | 6.294           | <0.001  | 5.355       | <0.001  | 7.212       | <0.001  |

|                    |                                                |        |        |        |        |        |        |
|--------------------|------------------------------------------------|--------|--------|--------|--------|--------|--------|
|                    | <b>Serotype 2</b>                              | 6.739  | <0.001 | 6.052  | <0.001 | 7.366  | <0.001 |
|                    | <b>Serotype 3</b>                              | 7.177  | <0.001 | 5.862  | <0.001 | 8.466  | <0.001 |
|                    | <b>Serotype 4</b>                              | 6.924  | <0.001 | 6.208  | <0.001 | 7.667  | <0.001 |
| <b>DENV4 titre</b> | <b>Age</b>                                     | 0.767  | 0.714  | 2.519  | 0.486  | 0.515  | 0.831  |
|                    | <b>Gender (Female)</b>                         | 0.102  | 0.596  | 0.148  | 0.648  | 0.135  | 0.541  |
|                    | <b>Months to follow-ups</b>                    | 0.010  | 0.712  | 0.882  | 0.179  | -0.070 | 0.346  |
|                    | <b>Immune Status (Secondary)</b>               | 3.286  | <0.001 | 3.448  | <0.001 | 3.060  | <0.001 |
|                    | <b>Immune Status *<br/>Months to follow-up</b> | -0.044 | 0.428  | 0.310  | 0.802  | 0.331  | 0.050  |
|                    | <b>Serotype 1</b>                              | 5.860  | <0.001 | 4.738  | <0.001 | 6.652  | <0.001 |
|                    | <b>Serotype 2</b>                              | 6.436  | <0.001 | 5.522  | <0.001 | 6.998  | <0.001 |
|                    | <b>Serotype 3</b>                              | 5.406  | <0.001 | 4.091  | <0.001 | 6.414  | <0.001 |
|                    | <b>Serotype 4</b>                              | 7.029  | <0.001 | 6.098  | <0.001 | 7.735  | <0.001 |
| <b>SLEV titre</b>  | <b>Age</b>                                     | 6.420  | 0.004  | 7.135  | 0.045  | 6.755  | 0.017  |
|                    | <b>Gender (Female)</b>                         | -0.106 | 0.603  | -0.156 | 0.623  | -0.006 | 0.982  |
|                    | <b>Months to follow-ups</b>                    | -0.036 | 0.219  | 0.571  | 0.372  | -0.120 | 0.167  |
|                    | <b>ImmuneStatus (Secondary)</b>                | 2.700  | <0.001 | 3.105  | <0.001 | 2.235  | <0.001 |
|                    | <b>ImmuneStatus *<br/>Months to follow-up</b>  | -0.148 | 0.011  | -0.757 | 0.531  | 0.020  | 0.921  |
|                    | <b>Serotype 1</b>                              | 5.747  | <0.001 | 4.764  | <0.001 | 6.717  | <0.001 |
|                    | <b>Serotype 2</b>                              | 6.297  | <0.001 | 5.631  | <0.001 | 6.914  | <0.001 |
|                    | <b>Serotype 3</b>                              | 5.327  | <0.001 | 4.110  | <0.001 | 6.524  | <0.001 |
|                    | <b>Serotype 4</b>                              | 5.839  | <0.001 | 5.549  | <0.001 | 6.161  | <0.001 |
| <b>WNV titre</b>   | <b>Age</b>                                     | 4.306  | 0.064  | 6.924  | 0.060  | 2.736  | 0.373  |
|                    | <b>Gender (Female)</b>                         | -0.011 | 0.959  | -0.049 | 0.882  | 0.109  | 0.699  |
|                    | <b>Months to follow-ups</b>                    | -0.162 | <0.001 | 0.474  | 0.474  | -0.072 | 0.452  |
|                    | <b>ImmuneStatus (Secondary)</b>                | 2.151  | <0.001 | 2.468  | <0.001 | 1.862  | <0.001 |
|                    | <b>ImmuneStatus *<br/>Months to follow-up</b>  | -0.103 | 0.093  | -0.734 | 0.557  | 0.053  | 0.802  |

|                          |                                               |                   |        |        |        |        |        |
|--------------------------|-----------------------------------------------|-------------------|--------|--------|--------|--------|--------|
|                          | <b>Serotype 1</b>                             | 5.564             | <0.001 | 4.496  | <0.001 | 5.223  | <0.001 |
|                          | <b>Serotype 2</b>                             | 5.973             | <0.001 | 5.044  | <0.001 | 5.592  | <0.001 |
|                          | <b>Serotype 3</b>                             | 5.095             | <0.001 | 3.747  | <0.001 | 5.173  | <0.001 |
|                          | <b>Serotype 4</b>                             | 5.717             | <0.001 | 5.014  | <0.001 | 5.241  | <0.001 |
| <b>ZIKV titre</b>        | <b>Age</b>                                    | 7.047             | 0.003  | 5.103  | 0.173  | 8.062  | 0.008  |
|                          | <b>Gender (Female)</b>                        | -0.180            | 0.402  | -0.312 | 0.352  | -0.099 | 0.717  |
|                          | <b>Months to follow-ups</b>                   | -0.095            | 0.002  | -0.642 | 0.342  | -0.066 | 0.479  |
|                          | <b>ImmuneStatus (Secondary)</b>               | 2.605             | <0.001 | 3.176  | <0.001 | 2.066  | <0.001 |
|                          | <b>ImmuneStatus *<br/>Months to follow-up</b> | -0.176            | 0.004  | -1.353 | 0.288  | 0.009  | 0.964  |
|                          | <b>Serotype 1</b>                             | 4.903             | <0.001 | 5.296  | <0.001 | 4.880  | <0.001 |
|                          | <b>Serotype 2</b>                             | 4.886             | <0.001 | 5.311  | <0.001 | 4.826  | <0.001 |
|                          | <b>Serotype 3</b>                             | 4.414             | <0.001 | 4.593  | <0.001 | 4.571  | <0.001 |
|                          | <b>Serotype 4</b>                             | 4.818             | <0.001 | 5.526  | <0.001 | 4.389  | <0.001 |
| <b>ZIKV.Brasil titre</b> | <b>Age</b>                                    | 6.056             | 0.010  | 4.671  | 0.207  | 7.026  | 0.022  |
|                          | <b>Gender (Female)</b>                        | -0.160            | 0.457  | -0.338 | 0.308  | -0.017 | 0.953  |
|                          | <b>Months to follow-ups</b>                   | -0.091            | 0.004  | -0.347 | 0.604  | -0.140 | 0.137  |
|                          | <b>ImmuneStatus (Secondary)</b>               | 2.868             | <0.001 | 3.455  | <0.001 | 2.263  | <0.001 |
|                          | <b>ImmuneStatus *<br/>Months to follow-up</b> | -0.185            | 0.002  | -1.512 | 0.230  | 0.020  | 0.922  |
|                          | <b>Serotype 1</b>                             | 5.195             | <0.001 | 5.226  | <0.001 | 5.831  | <0.001 |
|                          | <b>Serotype 2</b>                             | 5.432             | <0.001 | 5.612  | <0.001 | 5.869  | <0.001 |
|                          | <b>Serotype 3</b>                             | 4.805             | <0.001 | 4.532  | <0.001 | 5.678  | <0.001 |
|                          |                                               | <b>Serotype 4</b> | 5.179  | <0.001 | 5.647  | <0.001 | 5.269  |

**Table S2.** Multivariable linear regression analysis. In each regression, we examined the effects of multiple variables (i.e. age, gender as female, immune status as being a secondary infection, and infecting DENV serotype) on an outcome (i.e. microarray titre). Note that ‘Age’ was scaled by dividing the values by 100, and ‘Months to follow-ups’ was scaled by dividing ‘Days to follow-ups’ by 30.

| Data        | Outcome       | Predictors                                                            | AIC    |
|-------------|---------------|-----------------------------------------------------------------------|--------|
| Follow-up 1 | Immune status | DENV1 + DENV2 + DENV3 + DENV4 + WNV + ZIKV + ZIKV.Brasil + SLEV + Age | 108.53 |
|             |               | DENV1 + DENV2 + DENV3 + DENV4 + WNV + ZIKV + SLEV + Age               | 106.59 |
|             |               | DENV1 + DENV3 + DENV4 + WNV + ZIKV + SLEV + Age                       | 104.7  |
|             |               | DENV3 + DENV4 + WNV + ZIKV + SLEV + Age                               | 103.12 |
|             |               | DENV3 + DENV4 + WNV + ZIKV + SLEV                                     | 101.74 |
|             |               | DENV3 + DENV4 + ZIKV + SLEV                                           | 101.61 |

| Data        | Outcome       | Predictors                                                            | AIC   |
|-------------|---------------|-----------------------------------------------------------------------|-------|
| Follow-up 2 | Immune status | DENV1 + DENV2 + DENV3 + DENV4 + WNV + ZIKV + ZIKV.Brasil + SLEV + Age | 86.6  |
|             |               | DENV1 + DENV2 + DENV3 + DENV4 + WNV + ZIKV + ZIKV.Brasil + SLEV       | 84.6  |
|             |               | DENV1 + DENV3 + DENV4 + WNV + SLEV                                    | 80.67 |
|             |               | DENV3 + DENV4 + WNV + ZIKV + SLEV                                     | 78.92 |
|             |               | DENV3 + DENV4 + ZIKV + SLEV                                           | 78.04 |

| Data            | Outcome       | Predictors                                                            | AIC    |
|-----------------|---------------|-----------------------------------------------------------------------|--------|
| Both follow-ups | Immune status | DENV1 + DENV2 + DENV3 + DENV4 + WNV + ZIKV + ZIKV.Brasil + SLEV + Age | 188.16 |
|                 |               | DENV1 + DENV3 + DENV4 + WNV + ZIKV + ZIKV.Brasil + SLEV               | 186.18 |
|                 |               | DENV1 + DENV3 + DENV4 + WNV + ZIKV + SLEV + Age                       | 182.49 |
|                 |               | DENV3 + DENV4 + WNV + ZIKV + SLEV                                     | 180.91 |

**Table S3.** AIC for all models considered for determining immune status



| Model                                                                                                 | Test set         |                   |
|-------------------------------------------------------------------------------------------------------|------------------|-------------------|
|                                                                                                       | AUC (95% CI)     | Accuracy (95% CI) |
| <b>Model A (follow-up point 1)</b><br>(141 observations: 55 primary cases and 86 secondary cases)     |                  |                   |
| Round 1                                                                                               | 0.97 (0.91-1)    | 0.90 (0.73-0.98)  |
| Round 2                                                                                               | 0.82 (0.60-1)    | 0.71 (0.51-0.87)  |
| Round 3                                                                                               | 0.92 (0.80-1)    | 0.82 (0.63-0.94)  |
| Round 4                                                                                               | 0.88 (0.72-0.99) | 0.82 (0.63-0.94)  |
| Round 5                                                                                               | 1 (1-1)          | 0.96 (0.82-1)     |
| Average                                                                                               | 0.90 (0.83-0.96) | 0.84 (0.66-0.75)  |
| <b>Model B (follow-up point 2)</b><br>(141 observations: 55 primary cases and 86 secondary cases)     |                  |                   |
| Round 1                                                                                               | 0.93 (0.81-1)    | 0.86 (0.68-0.96)  |
| Round 2                                                                                               | 0.96 (0.89-1)    | 0.82 (0.63-0.94)  |
| Round 3                                                                                               | 0.97 (0.91-1)    | 0.89 (0.72-0.98)  |
| Round 4                                                                                               | 0.94 (0.84-1)    | 0.93 (0.77-0.99)  |
| Round 5                                                                                               | 0.96 (0.89-1)    | 0.82 (0.63-0.94)  |
| Average                                                                                               | 0.95 (0.92-0.98) | 0.86 (0.68-0.96)  |
| <b>Model C (both follow-up points)</b><br>(282 observations: 55 primary cases and 86 secondary cases) |                  |                   |
| Round 1                                                                                               | 0.93 (0.85-0.98) | 0.82 (0.70-0.91)  |
| Round 2                                                                                               | 0.93 (0.86-0.99) | 0.86 (0.74-0.94)  |
| Round 3                                                                                               | 0.95 (0.88-0.99) | 0.84 (0.72-0.93)  |
| Round 4                                                                                               | 0.94 (0.86-0.99) | 0.89 (0.78-0.96)  |
| Round 5                                                                                               | 0.92 (0.84-0.98) | 0.84 (0.72-0.93)  |
| Average                                                                                               | 0.93 (0.90-0.96) | 0.85 (0.73-0.93)  |

Table S4: Results for each round of 5-fold validation for the models determining immune status

| Model                                                                                                                             | Test set           |                   |
|-----------------------------------------------------------------------------------------------------------------------------------|--------------------|-------------------|
|                                                                                                                                   | Kappa (95% CI)     | Accuracy (95% CI) |
| <b>Model D (primary infections)</b><br>(110 observations: 28 DENV1, 17 DENV2, 7 DENV3, 3 DENV4)                                   |                    |                   |
| Round 1                                                                                                                           | 0.83 (0.67-0.98)   | 0.89 (0.75-0.97)  |
| Round 2                                                                                                                           | 0.92 (0.80-1)      | 0.95 (0.82-0.99)  |
| Round 3                                                                                                                           | 0.86 (0.71-1)      | 0.92 (0.78-0.98)  |
| Average                                                                                                                           | 0.87 (0.72-0.99)   | 0.92 (0.78-0.98)  |
| <b>Model E (secondary infections)</b><br>(172 observations: 27 DENV1, 26 DENV2, 12 DENV3, 21 DENV4)                               |                    |                   |
| Round 1                                                                                                                           | 0.24 (0.10-0.42)   | 0.46 (0.32-0.59)  |
| Round 2                                                                                                                           | 0.31 (0.14-0.48)   | 0.49 (0.36-0.63)  |
| Round 3                                                                                                                           | 0.16 (0-0.33)      | 0.40 (0.27-0.53)  |
| Average                                                                                                                           | 0.24 (0.08-0.41)   | 0.45 (0.32-0.58)  |
| <b>Model F (including secondary infections at higher dilutions)</b><br>(172 observations: 27 DENV1, 26 DENV2, 12 DENV3, 21 DENV4) |                    |                   |
| Round 1                                                                                                                           | 0.14 (-0.03, 0.31) | 0.36 (0.34-0.61)  |
| Round 2                                                                                                                           | 0.27 (0.12, 0.41)  | 0.43 (0.30, 0.57) |
| Round 3                                                                                                                           | 0.35 (0.18, 0.52)  | 0.52 (0.39, 0.66) |
| Average                                                                                                                           | 0.25 (0.09, 0.41)  | 0.43 (0.34, 0.61) |

Table S5: Results for each round of 3-fold validation for the models determining most recent infecting serotype

|           | Model A   |         |         |           | Model B   |         |         |           | Model C   |         |         |           |
|-----------|-----------|---------|---------|-----------|-----------|---------|---------|-----------|-----------|---------|---------|-----------|
| Round 1   |           |         | True    |           |           |         | True    |           |           |         | True    |           |
|           |           |         | Primary | Secondary |           |         | Primary | Secondary |           |         | Primary | Secondary |
|           | Predicted | Primary | 9       | 1         | Predicted | Primary | 10      | 3         | Predicted | Primary | 19      | 7         |
| Secondary |           | 2       | 17      | Secondary |           | 1       | 15      | Secondary |           | 3       | 27      |           |
| Round 2   |           |         | True    |           |           |         | True    |           |           |         | True    |           |
|           |           |         | Primary | Secondary |           |         | Primary | Secondary |           |         | Primary | Secondary |
|           | Predicted | Primary | 8       | 5         | Predicted | Primary | 10      | 4         | Predicted | Primary | 18      | 4         |
| Secondary |           | 3       | 12      | Secondary |           | 1       | 13      | Secondary |           | 4       | 30      |           |
| Round 3   |           |         | True    |           |           |         | True    |           |           |         | True    |           |
|           |           |         | Primary | Secondary |           |         | Primary | Secondary |           |         | Primary | Secondary |
|           | Predicted | Primary | 9       | 3         | Predicted | Primary | 10      | 2         | Predicted | Primary | 21      | 8         |
| Secondary |           | 2       | 14      | Secondary |           | 1       | 15      | Secondary |           | 1       | 27      |           |
| Round 4   |           |         | True    |           |           |         | True    |           |           |         | True    |           |
|           |           |         | Primary | Secondary |           |         | Primary | Secondary |           |         | Primary | Secondary |
|           | Predicted | Primary | 10      | 4         | Predicted | Primary | 10      | 1         | Predicted | Primary | 19      | 3         |
| Secondary |           | 1       | 13      | Secondary |           | 1       | 16      | Secondary |           | 3       | 31      |           |
| Round 5   |           |         | True    |           |           |         | True    |           |           |         | True    |           |
|           |           |         | Primary | Secondary |           |         | Primary | Secondary |           |         | Primary | Secondary |
|           | Predicted | Primary | 10      | 0         | Predicted | Primary | 11      | 5         | Predicted | Primary | 21      | 8         |
| Secondary |           | 1       | 17      | Secondary |           | 0       | 12      | Secondary |           | 1       | 27      |           |

**Table S6.** Confusion matrices of immune status defined by PRNT60 (**True**), and by predictive binomial logistic models A, B and C (**Predicted**) when applying the models on test sets in 5-fold cross-validation.

|                | Model A |      |      |      | Model B |      |      |      | Model C |      |      |      |
|----------------|---------|------|------|------|---------|------|------|------|---------|------|------|------|
|                | SENS    | SPEC | PPV  | NPV  | SENS    | SPEC | PPV  | NPV  | SENS    | SPEC | PPV  | NPV  |
| <b>Round 1</b> | 0.82    | 0.94 | 0.9  | 0.89 | 0.90    | 0.83 | 0.77 | 0.94 | 0.86    | 0.79 | 0.73 | 0.9  |
| <b>Round 2</b> | 0.73    | 0.71 | 0.62 | 0.80 | 0.91    | 0.76 | 0.71 | 0.93 | 0.82    | 0.88 | 0.82 | 0.88 |
| <b>Round 3</b> | 0.82    | 0.82 | 0.75 | 0.88 | 0.91    | 0.88 | 0.83 | 0.94 | 1       | 0.77 | 0.73 | 1    |
| <b>Round 4</b> | 0.91    | 0.76 | 0.71 | 0.93 | 0.91    | 0.94 | 0.91 | 0.94 | 0.91    | 0.91 | 0.87 | 0.94 |
| <b>Round 5</b> | 0.91    | 1    | 1.00 | 0.94 | 0.91    | 0.76 | 0.71 | 0.93 | 0.77    | 0.80 | 0.71 | 0.85 |

**Table S7.** Additional metrics illustrating the performance of predictive binomial logistic models A, B and C on test sets in 5-fold cross validation. **SENS:** sensitivity, **SPEC:** specificity, **PPV:** positive predictive value, **NPV:** negative predictive value.

|         |           | Model D |       |       |       | Model E |           |       |       | Model F |   |       |           |       |       |    |   |    |
|---------|-----------|---------|-------|-------|-------|---------|-----------|-------|-------|---------|---|-------|-----------|-------|-------|----|---|----|
|         |           | True    |       |       |       |         | True      |       |       |         |   | True  |           |       |       |    |   |    |
|         |           | DENV1   | DENV2 | DENV3 | DENV4 |         | DENV1     | DENV2 | DENV3 | DENV4   |   | DENV1 | DENV2     | DENV3 | DENV4 |    |   |    |
| Round 1 | Predicted | DENV1   | 18    | 0     | 0     | 0       | Predicted | DENV1 | 11    | 3       | 2 | 4     | Predicted | DENV1 | 5     | 2  | 2 | 4  |
|         |           | DENV2   | 2     | 9     | 1     | 0       |           | DENV2 | 8     | 8       | 2 | 5     |           | DENV2 | 11    | 7  | 3 | 4  |
|         |           | DENV3   | 1     | 0     | 4     | 0       |           | DENV3 | 0     | 0       | 3 | 1     |           | DENV3 | 1     | 1  | 3 | 0  |
|         |           | DENV4   | 1     | 1     | 0     | 2       |           | DENV4 | 3     | 2       | 1 | 4     |           | DENV4 | 4     | 4  | 0 | 6  |
| Round 2 | Predicted | DENV1   | 15    | 0     | 0     | 0       | Predicted | DENV1 | 12    | 4       | 2 | 4     | Predicted | DENV1 | 11    | 15 | 2 | 6  |
|         |           | DENV2   | 2     | 13    | 0     | 0       |           | DENV2 | 1     | 5       | 0 | 3     |           | DENV2 | 0     | 3  | 3 | 0  |
|         |           | DENV3   | 1     | 0     | 6     | 0       |           | DENV3 | 1     | 1       | 4 | 0     |           | DENV3 | 1     | 4  | 3 | 0  |
|         |           | DENV4   | 0     | 0     | 0     | 1       |           | DENV4 | 2     | 9       | 2 | 7     |           | DENV4 | 0     | 2  | 0 | 8  |
| Round 3 | Predicted | DENV1   | 19    | 0     | 1     | 0       | Predicted | DENV1 | 9     | 8       | 3 | 5     | Predicted | DENV1 | 9     | 4  | 1 | 0  |
|         |           | DENV2   | 0     | 11    | 0     | 2       |           | DENV2 | 4     | 6       | 3 | 2     |           | DENV2 | 7     | 8  | 4 | 3  |
|         |           | DENV3   | 0     | 0     | 2     | 0       |           | DENV3 | 1     | 0       | 1 | 0     |           | DENV3 | 0     | 1  | 2 | 0  |
|         |           | DENV4   | 0     | 0     | 0     | 1       |           | DENV4 | 2     | 6       | 1 | 7     |           | DENV4 | 5     | 1  | 1 | 11 |

**Table S8.** Confusion matrices of infecting DV serotype defined by RT-PCR (**True**), and by predictive multinomial logistic models D, E and F (**Predicted**) when applying the models on test sets in 3-fold cross-validation.

|         |       | Model D |      |      |      | Model E |      |      |      | Model F |      |      |      |
|---------|-------|---------|------|------|------|---------|------|------|------|---------|------|------|------|
|         |       | SENS    | SPEC | PPV  | NPV  | SENS    | SPEC | PPV  | NPV  | SENS    | SPEC | PPV  | NPV  |
| Round 1 | DENV1 | 0.90    | 1    | 1    | 0.89 | 0.50    | 0.74 | 0.55 | 0.70 | 0.23    | 0.77 | 0.38 | 0.63 |
|         | DENV2 | 0.90    | 0.89 | 0.75 | 0.96 | 0.62    | 0.66 | 0.38 | 0.5  | 0.50    | 0.58 | 0.28 | 0.78 |
|         | DENV3 | 0.80    | 1    | 1    | 0.97 | 0.38    | 0.98 | 0.75 | 0.91 | 0.37    | 0.95 | 0.60 | 0.90 |
|         | DENV4 | 1       | 0.97 | 0.67 | 1    | 0.29    | 0.86 | 0.40 | 0.79 | 0.42    | 0.81 | 0.43 | 0.81 |
| Round 2 | DENV1 | 0.88    | 1    | 1    | 0.91 | 0.75    | 0.76 | 0.55 | 0.89 | 0.91    | 0.12 | 0.38 | 0.57 |
|         | DENV2 | 1       | 0.92 | 0.87 | 1    | 0.26    | 0.89 | 0.56 | 0.71 | 0.50    | 0.91 | 0.90 | 0.95 |
|         | DENV3 | 1       | 1    | 1    | 1    | 0.5     | 0.96 | 0.7  | 0.92 | 0.37    | 0.90 | 0.37 | 0.90 |
|         | DENV4 | 1       | 1    | 1    | 1    | 0.5     | 0.70 | 0.35 | 0.81 | 0.57    | 0.95 | 0.80 | 0.87 |
| Round 3 | DENV1 | 1       | 0.94 | 0.95 | 1    | 0.56    | 0.62 | 0.36 | 0.79 | 0.42    | 0.86 | 0.64 | 0.72 |
|         | DENV2 | 1       | 0.92 | 0.85 | 1    | 0.3     | 0.76 | 0.40 | 0.67 | 0.57    | 0.67 | 0.36 | 0.82 |
|         | DENV3 | 0.67    | 1    | 1    | 0.97 | 0.13    | 0.98 | 0.50 | 0.88 | 0.25    | 0.97 | 0.66 | 0.88 |
|         | DENV4 | 0.33    | 1    | 1    | 0.94 | 0.50    | 0.80 | 0.44 | 0.83 | 0.78    | 0.83 | 0.61 | 0.92 |

**Table S9.** Additional metrics illustrating the performance of predictive binomial logistic models D, E and F on test sets 3-fold cross validation. **SENS:** sensitivity, **SPEC:** specificity, **PPV:** positive predictive value, **NPV:** negative predictive value.

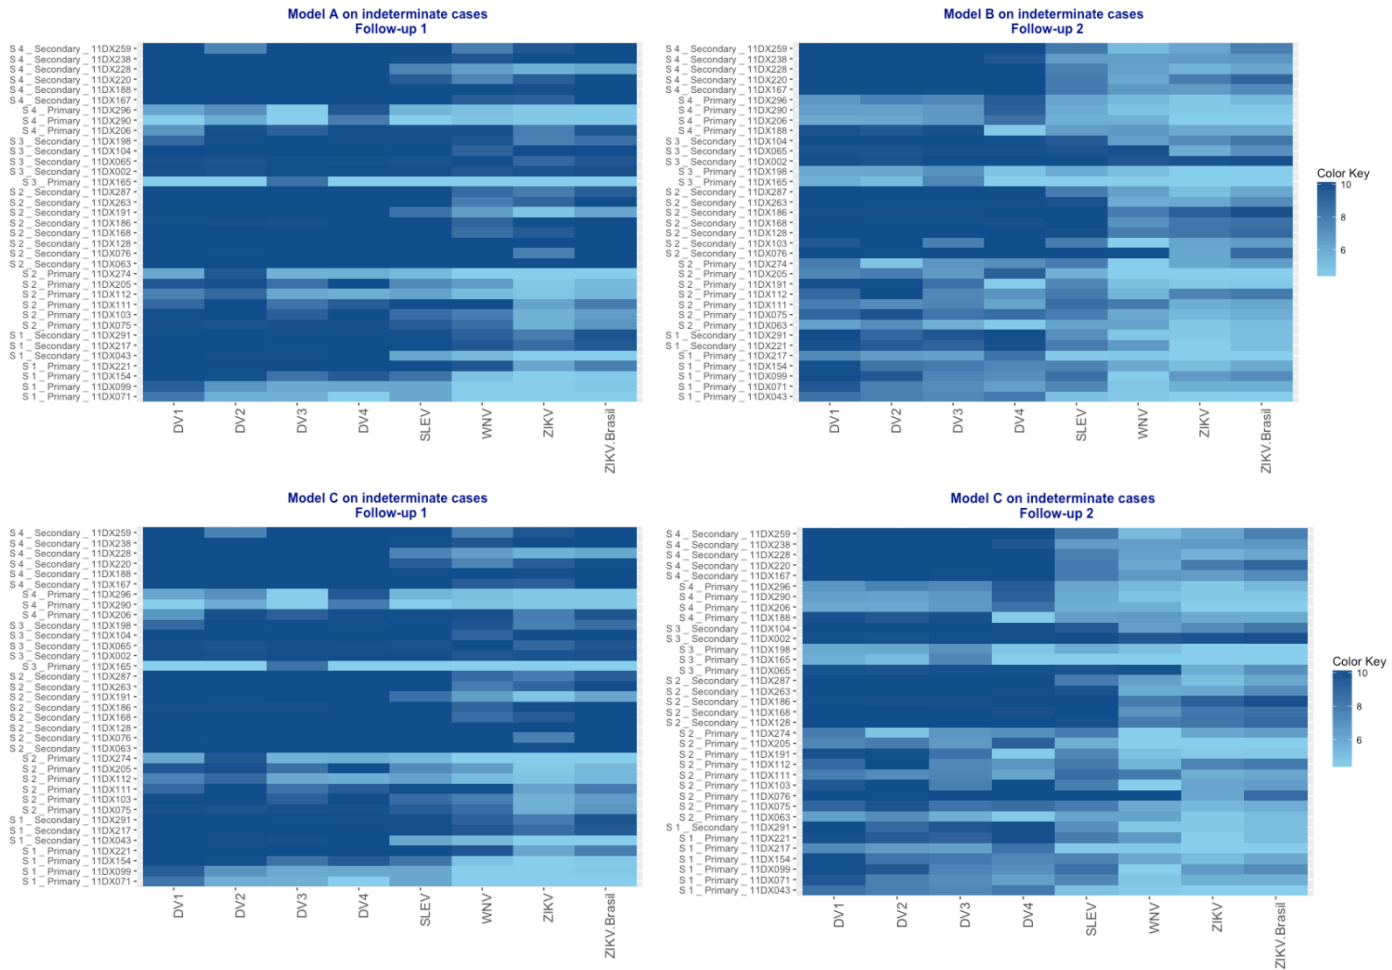

Figure S4. Heatmaps illustrating antibody profiles of indeterminate cases at two follow-up time points (S: serotype).

| Infecting DV serotype of predicted primary cases by model A |       | Predicted |     |     |     | Kappa (95% CI)      | Accuracy (95% CI)   |
|-------------------------------------------------------------|-------|-----------|-----|-----|-----|---------------------|---------------------|
|                                                             |       | DV1       | DV2 | DV3 | DV4 |                     |                     |
| True                                                        | DENV1 | 3         | 1   | 0   | 0   | 0.79<br>(0.52-1)    | 0.86<br>(0.57-0.98) |
|                                                             | DENV2 | 1         | 5   | 0   | 0   |                     |                     |
|                                                             | DENV3 | 0         | 0   | 1   | 0   |                     |                     |
|                                                             | DENV4 | 0         | 0   | 0   | 3   |                     |                     |
| Infecting DV serotype of predicted primary cases by model B |       | Predicted |     |     |     | Kappa (95% CI)      | Accuracy (95% CI)   |
|                                                             |       | DV1       | DV2 | DV3 | DV4 |                     |                     |
| True                                                        | DENV1 | 4         | 3   | 0   | 1   | 0.55<br>(0.26-0.84) | 0.66<br>(0.41-0.87) |
|                                                             | DENV2 | 0         | 3   | 0   | 0   |                     |                     |
|                                                             | DENV3 | 0         | 0   | 2   | 0   |                     |                     |
|                                                             | DENV4 | 1         | 1   | 0   | 3   |                     |                     |
| Infecting DV serotype of predicted primary cases by model C |       | Predicted |     |     |     | Kappa (95% CI)      | Accuracy (95% CI)   |
|                                                             |       | DV1       | DV2 | DV3 | DV4 |                     |                     |
| True                                                        | DENV1 | 8         | 4   | 0   | 1   | 0.69<br>(0.50-0.88) | 0.78<br>(0.61-0.90) |
|                                                             | DENV2 | 1         | 10  | 0   | 0   |                     |                     |
|                                                             | DENV3 | 0         | 0   | 4   | 0   |                     |                     |
|                                                             | DENV4 | 1         | 1   | 0   | 6   |                     |                     |

**Table S10.** Results of serotype-identifying model D when applied on indeterminate cases that have been classified as primary cases by models A, B and C. The table includes confusion matrices of infecting DV serotype defined by RT-PCR (True) and by model D (Predicted), and performance of model D assessed by kappa statistic and accuracy.



## User-defined R scripts

These use-defined R scripts should be used in the following order. With a description of what each file does. Files after titre calculation are made available as an appendix to the paper. Raw files of slides are available on request (large files).

1. Titre calculation
  - a. Calculation of the PMA titre that is used in the analysis from the raw scanned data files including positive control
  - b. Performing quality control on the obtained titres
2. Model selection and validation (after titre calculation)
  - a. With the titres obtained in section 1 the different models were tested using cross-validation for i) predicting the immune status of patients, ii) predicting the serotype of infections for each immune status group

## Scripts

1. Titre calculation

**Create a modified 64-pad microarray layout. This is the layout in which 1 positive control is tested in 8 dilutions.**

```
# Load normal layout
plotArrayLayout(layout64pad4x4fold)

# Modify the loaded layout
newlayout = layout64pad4x4fold
newlayout[newlayout$agArrayID == 's16', 'DilutionSteps'] = c(8,32,128,512)
newlayout[newlayout$agArrayID == 's16', 'agArrayID'] = rep('s15',4)

# Load the new layout
plotArrayLayout(newlayout)

Prepare data for titre calculation.

# Import files containing fluorescent score data read from software
arrayList = readArrayFiles(directory = './files', array.layout = newlayout)

# Import worklist file
meta = readWorklist('./files/worklist.txt')

# Remove 's16', because we have 1 positive control tested in 8 dilutions
meta2 = meta[-grep('s16', meta$agArrayID), ]
```

**Titre calculation.**

*# Calculate titres using Median fluorescent values. Automatic normalisation is performed if positive control label is indicated*

```
agset = createAgArraySet(meta2, agArrayList = arrayList, pos.contr.label = 'PC', exclude.antigens = 'Empty', Value = 'Median')
```

**Quality Control.**

*# Plotting of positive controls is meant for checking slides with strangely low or high values. If there is any, remove it, then perform normalisation and titre calculation again.*

```
plotPositiveControl(agset, 'PC', what = 'titers')
```

*# Clean Antigens - There is a number of antigens against which positive control only gave background values. Normalisation cannot perform properly on background values. Therefore, these 'background' antigens will be removed.*

```
bg.antigens = c("CHIKV E1 mutant", "CHIKV E2", "TBEV - NS1", "YFV - NS1", "JEV - NS1", 'Empty')
```

```
agset1 = createAgArraySet(meta2, agArrayList=arrayList, pos.contr.label = 'PC', exclude.antigens = bg.antigens, Value = 'Median')
```

```
plotPositiveControl(agset1, 'PC', what = 'titers')
```

## **2. Model selection and validation**

### **Generation of training set and test set for 5-fold cross validation (3-fold was similarly done).**

*# Stratified sampling to maintain primary/secondary proportions as in the original dataset.*

```
set.seed(1)
folds = createFolds(data$ImmuneStatus, k=5, list=T, returnTrain=F)
```

*# Assigning of folds as training set and test set.*

*## In the first round, fold 1 will be assigned as test set. The remaining folds will be used as training set.*

```
names(folds)[1] = 'test'
names(folds)[2] = 'train1'
names(folds)[3] = 'train2'
names(folds)[4] = 'train3'
names(folds)[5] = 'train4'
```

```
train = data.frame(rbind(data[folds$train1,], data[folds$train2,], data[folds$train3,], data[folds$train4,]))
test = data.frame(data[folds$test,])
```

### **Model performance on training set.**

#### **Binomial logistic models A, B and C predicting immune status.**

*# Step-wise backward elimination approach starts with an all-inclusive models containing age and microarray titres measured at:*

*## Follow-up 1*

```
step(glm(ImmuneStatus ~ DV1 + DV2 + DV3 + DV4 + WNV + ZIKV + ZIKV.Brasil + SLEV + Age, data = data.fu1, family = binomial))
```

*## Follow-up 2*

```
step(glm(ImmuneStatus ~ DV1 + DV2 + DV3 + DV4 + WNV + ZIKV + ZIKV.Brasil + SLEV + Age, data = data.fu2, family = binomial))
```

*## Both follow-ups*

```
step(glm(ImmuneStatus ~ DV1 + DV2 + DV3 + DV4 + WNV + ZIKV + ZIKV.Brasil + SLEV + Age, data = data, family = binomial))
```

#### **Multinomial logistic models D and E predicting infecting dengue serotype.**

*# Step-wise backward elimination approach starts with an all-inclusive models containing age and microarray titres of:*

*## Primary cases*

```
step(multinom(Serotype ~ DV1 + DV2 + DV3 + DV4 + SLEV + WNV + ZIKV + ZIKV.Brasil + Age, data = primary))
```

```

## Secondary cases
step(multinom(Serotype ~ DV1 + DV2 + DV3 + DV4 + SLEV + WNV + ZIKV + ZIKV.Brasil + Age, data =
secondary))

# Area under the ROC curve (AUC) of model fitting on training set.
roc.MP.1 = roc(train$ImmuneStatus, lgr$fitted.values)
roc.MP.1$auc
  ## 95% confidence interval of AUC
set.seed(11)
ci.auc(roc.MP.1, conf.level = 0.95, method = 'bootstrap', boot.n = 2000)

Model performance on test set.
# Model prediction given the test set.
prob.MV.1 = as.vector(predict.glm(lgr, newdata = test, type = 'response'))

# Area under the ROC curve (AUC) of model predicting on test set.
roc.MV.1 = roc(test$ImmuneStatus, prob.MV.1)
  ## 95% confidence interval of AUC
set.seed(11)
ci.auc(roc.MV.1, conf.level = 0.95, method = 'bootstrap', boot.n = 2000)

```
